# Supplementary material for: Configurational assignment of rhizopodin, an actin-binding macrolide from the myxobacterium Myxococcus stipitatus
Source: Royal Society of Chemistry journal article supplement (doi:10.1039/b810405k), 2008-01-01
Supplement: b810405k.pdf [file b810405k.pdf]

## Supporting Information

# Configurational Assignment of Rhizopodin, an Actin-Binding Macrolide from the Myxobacterium *Myxococcus stipitatus*

Nicole Horstmann<sup>†</sup> and Dirk Menche<sup>\*,†,‡</sup>

<sup>†</sup> University of Heidelberg, Department of Organic Chemistry, INF 270, D-69120 Heidelberg, Germany and

<sup>‡</sup> Helmholtz Centre for Infection Research (HZI), Medicinal Chemistry, Inhoffenstr. 7, D-38124 Braunschweig, Germany.

dirk.menche@oci.uni-heidelberg.de

## Contents

### I. Tables of NMR Data

### II. Copies of 1D and 2D NMR spectra

### III. Molecular Modeling

## I. Tables of NMR Data

### General experimental

Nuclear magnetic resonance (NMR) spectra were recorded on a Bruker AM 600 spectrometer operating at a proton frequency of 600.13. Proton spectra were referenced to 3.34 for residual CHD<sub>2</sub>OD. The ROESY experiments were acquired with mixing times of 500ms.

**Table 1. <sup>1</sup>H-NMR data and ROESY Correlations for rhizopodin (600 MHz, CD<sub>3</sub>OD)**

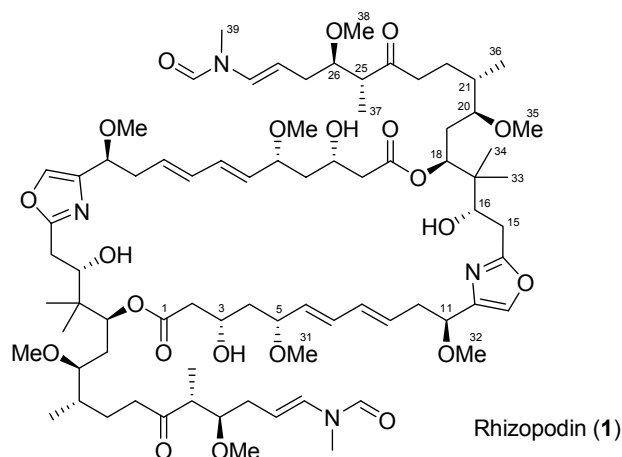

| #-H               | δ (ppm) | M    | J (Hz)                    | ROESY Correlations <sup>a</sup>                                                                                         |
|-------------------|---------|------|---------------------------|-------------------------------------------------------------------------------------------------------------------------|
| 2a-H              | 2.61    | dd   | 14.69 / 5.04              | 4b-H (m), 4a-H, 3-H (s), 5-H (m), 16-H (vw), 20-H (w)                                                                   |
| 2b-H              | 2.54    | dd   | 14.67 / 8.44              | 4a-H (m), 4b-H (w), 3-H (m), 5-H (w), 16-H (w), 20-H (vw)                                                               |
| 3-H               | 4.11    | dddd | 4.40 / 4.40 / 8.44 / 8.44 | 2a-H (s), 2b-H (m), 4a-H (m), 4b-H (s), 33/34-Me (w), 20-H (m), 31-Me (w), 5-H (s), 18-H (w), 6-H (s), 8-H (w), 7-H (m) |
| 4a-H              | 1.87    | ddd  | 14.04 / 9.54 / 6.41       | 2a-H, 2b-H (m), 3-H (m), 4b-H (s), 5-H (s), 6-H (m)                                                                     |
| 4b-H              | 1.69    | ddd  | 14.03 / 7.89 / 3.95       | 2a-H (m), 2b-H (w), 3-H (s), 4a-H (s), 5-H (m), 6-H (s)                                                                 |
| 5-H               | 3.86    | ddd  | 6.97 / 6.97 / 6.97        | 31-Me (s), 2a-H (m), 2b-H (w), 3-H (s), 7-H (s), 6-H (s), 4a/b-H (s), 10-H <sub>2</sub> (w)                             |
| 6-H               | 5.44    | dd   | 15.22 / 8.25              | 4b-H (s), 4a-H (m), 31-Me (s), 3-H (s), 9-H (w), 8-H (s), 7-H (m)                                                       |
| 7-H               | 6.24    | dd   | 15.04 / 10.64             | 10-H <sub>2</sub> (m), 31-Me (m), 5-H (s), 3-H (m), 6-H (m), 9-H (s), 8-H (s)                                           |
| 8-H               | 6.14    | dd   | 15.04 / 10.64             | 10-H <sub>2</sub> (s), 31-Me (m), 3-H (vw), 11-H (m), 6-H (s), 9-H (s), 7-H (s)                                         |
| 9-H               | 5.68    | ddd  | 14.67 / 6.97 / 6.97       | 10-H <sub>2</sub> (s), 11-H (s), 7-H (s), 13-H (vw), 8-H (m), 32-Me (vw)                                                |
| 10-H <sub>2</sub> | 2.66    | m    |                           | 32-Me (w), 8-H (s), 7-H (m), 11-H (s), 9-H (s), 13-H (w), 5-H (w)                                                       |
| 11-H              | 4.26    | t    | 6.60 / 6.60               | 32-Me (s), 9-H (s), 8-H (m), 13-H (s), 10-H <sub>2</sub> (s)                                                            |
| 13-H              | 7.74    | s    |                           | 11-H (s), 16-H (w), 32-Me (s), 15a-H (vw), 15b-H (w), 10-H <sub>2</sub> (w), 8-H (w), 9-H (m)                           |
| 15-Ha             | 3.00    | dd   | 15.41 / 2.57              | 33/34-Me (s), 16-H (s), 18-H (s), 15b-H (s)                                                                             |
| 15-Hb             | 2.88    | dd   | 15.22 / 10.45             | 33/34-Me (s), 16-H (m), 18-H (w), 15a-H (s)                                                                             |
| 16-H              | 3.98    | dd   | 10.27 / 2.57              | 2b-H (w), 33/34-Me (s), 15a-H (s), 15b-H (m), 18-H (s), 19-H <sub>2</sub> (m)                                           |
| 18-H              | 5.34    | dd   | 9.54 / 2.20               | 33/34-Me (s), 19-H (s), 15b-H (m), 15a-H (s), 20-H (s), 35-Me (s), 16-H (s), 3-H (vw), 21/22a-H (w)                     |
| 19-H <sub>2</sub> | 1.65    | m    |                           | 36-Me (m), 33/34-Me (s), 22b-H (m), 21/22a-H (m), 20-H (s), 18-H (s), 16-H (s)                                          |
| 20-H              | 3.09    | ddd  | 9.17 / 2.93 / 2.93        | 36-Me (s), 22b-H (w), 19-H <sub>2</sub> (s), 23-H (s), 35-Me (s), 3-H (m), 18-H (s), 21/22a-H (s)                       |
| 21/22a-H          | 1.82    | m    |                           | 36-Me (m), 22b-H (s), 19-H <sub>2</sub> (m), 23-H (s), 25-H (w), 20-H (s), 35-Me (s), 18-H (w)                          |
| 22-Hb             | 1.29    | m    |                           | 36-Me (m), 19-H <sub>2</sub> (m), 20-H (w), 35-Me (w), 21/22a-H (s), 23-H (s)                                           |
| 23-H <sub>2</sub> | 2.61    | m    |                           | 36-Me (s), 33/34-Me (w), 37-Me (s), 21/22a-H (s), 22b-H (s), 25-H (m), 20-H (m), 26-H (m)                               |
| 25-H              | 2.85    | d    | 8.54                      | 28-H (m), 38-Me (m), 23-H (s), 27a-H (w), 27b-H (m), 21/22a-H (w), 37-Me (s), 26-H (s)                                  |

<sup>a</sup>definitions: (s) = strong, (m) = medium, (w) = weak

<sup>b</sup>19a/19b are resolved in CDCl<sub>3</sub>: crucial ROESY data 19a-H: 16-H (w), 18-H (m), 20-H (s), 21-H (m), 22a-H (w), 22b-H (m), 33/34-Me (s), 36-Me (m), 19b-H: 16-H (w), 18-H (s), 20-H (m), 21-H (m), 22a-H (w), 22b-H (m), 33/34-Me (s), 36-Me (m)

| #-H               | $\delta$ (ppm) | M   | J (Hz)              | ROESY Correlations <sup>a</sup>                                                                                 |
|-------------------|----------------|-----|---------------------|-----------------------------------------------------------------------------------------------------------------|
| 26-H              | 3.52           | ddd | 8.34 / 8.34 / 4.22  | 37-Me (s), 38-Me (s), 28-H (m), 27b-H (s), 27a-H (s),<br>23-H (s), 25-H (s)                                     |
| 27-Ha             | 2.54           | ddd | 15.10 / 4.70 / 4.70 | 37-Me (m), 27a-H (s), 25-H (m), 38-Me (s), 26-H (s), 28-H (m), 29-H (w)                                         |
| 27-Hb             | 2.24           | ddd | 14.20 / 7.90 / 5.20 | 37-Me (s), 25-H (m), 27a-H (s), 28-H (m), 29-H (m), 26-H (s)                                                    |
| 28-H              | 5.23           | ddd | 14.31 / 7.70 / 6.60 | 25-H (m), 39-Me (s), 38-Me (m), 26-H (m), 27a-H (s), 27b-H (s), 29-H (s),                                       |
| 29-H              | 6.77 / 7.17*   | d   | 13.94 / 14.31*      | 37-Me (w), 27b-H (s), 27a-H (m), 39-Me (w), 38-Me (vw), 30-H (s),<br>28-H (s)                                   |
| 30-H              | 8.36 / 8.12*   | s   |                     | 39-Me (w), 29-H (s)                                                                                             |
| 31-H <sub>3</sub> | 3.26           | s   |                     | 4b-H (w), 4a-H (s), 5-H (s), 3-H (w), 6-H (m), 9-H (w), 8-H (w), 7-H (m)                                        |
| 32-H <sub>3</sub> | 3.31           | s   |                     | 10-H <sub>2</sub> (m), 9-H (m), 8-H (m), 13-H (s), 11-H (s)                                                     |
| 33-H <sub>3</sub> | 0.97           | s   |                     | 19-H <sub>2</sub> (s), 15b-H (s), 15a-H (s), 16-H (s), 3-H (w), 18-H (s)                                        |
| 35-H <sub>3</sub> | 3.37           | s   |                     | 36-Me (m), 33/34-Me (m), 37-Me (w), 22b-H (m), 19-H (m), 23-H (m),<br>20-H (s), 3-H (w), 18-H (s), 21/22a-H (s) |
| 36-H <sub>3</sub> | 0.89           | d   | 6.97                | 22b-H (s), 19-H (s), 23-H (s), 20-H (s), 35-Me (s), 21/22a-H (m)                                                |
| 37-H <sub>3</sub> | 1.04 / 1.04*   | d   | 6.97 / 6.60*        | 21/22a-H (w), 27b-H (s), 27a-H (m), 23-H (m), 38-Me (w), 26-H (s),<br>25-H (s), 28-H (w)                        |
| 38-H <sub>3</sub> | 3.35           | s   |                     | 33/34-Me (w), 37-Me (w), 21/22a-H (w), 27b-H (w), 27a-H (m), 26-H (s),<br>28-H (m), 29-H (w)                    |
| 39-H <sub>3</sub> | 3.06 / 3.15*   | s   |                     | 28-H (s), 29-H (m), 30-H (w)                                                                                    |

<sup>a</sup>definitions: (s) = strong, (m) = medium, (w) = weak

\*minor isomer

**Table 2. <sup>1</sup>H-NMR data for rhizopodin (600 MHz, CDCl<sub>3</sub>)**

| #-H               | $\delta$ (ppm) | M   | J (Hz)              | #-H                  | $\delta$ (ppm) | M   | J (Hz)              |
|-------------------|----------------|-----|---------------------|----------------------|----------------|-----|---------------------|
| 2a-H              | 2.49           | m   |                     | 21-H                 | 1.73           | m   |                     |
| 2b-H              | 2.47           | m   |                     | 22-Ha                | 1.77           | m   |                     |
| 3-H               | 4.28           | m   |                     | 22-Hb                | 1.28           | m   |                     |
| 4a-H              | 1.86           | ddd | 14.31 / 8.44 / 8.44 | 23-Ha                | 2.52           | m   |                     |
| 4b-H              | 1.63           | ddd | 14.31 / 3.67 / 3.67 | 23-Hb                | "              | "   |                     |
| 5-H               | 3.79           | ddd | 8.80 / 8.80 / 5.14  | 25-H                 | 2.69           | dq  |                     |
| 6-H               | 5.38           | dd  | 15.04 / 8.07        | 26-H                 | 3.44           | ddd | 8.80 / 8.80 / 4.03  |
| 7-H               | 6.18           | dd  | 14.67 / 10.27       | 27-Ha                | 2.44           | m   |                     |
| 8-H               | 6.12           | dd  |                     | 27-Hb                | 2.13           | ddd | 13.94 / 7.70 / 5.14 |
| 9-H               | 5.76           | ddd | 14.67 / 7.24 / 6.97 | 28-H                 | 5.07           | ddd | 14.67 / 8.06 / 6.97 |
| 10a-H             | 2.62           | ddd | 15.22 / 7.89 / 7.70 | 29-H                 | 6.50 / 7.17*   | d   | 13.94               |
| 10b-H             | 2.50           | m   |                     | 30-H                 | 8.27 / 8.05*   | s   |                     |
| 11-H              | 4.12           | s   |                     | 31-H                 | 3.21           | s   |                     |
| 13-H              | 7.43           | s   |                     | 32-H                 | 3.28           | s   |                     |
| 15-H <sub>2</sub> | 2.80           | m   |                     | 33/34-H <sub>3</sub> | 0.90           | s   |                     |
| 16-OH             | 3.76           | d   | 5.14                | 35-H <sub>3</sub>    | 3.35           | s   |                     |
| 16-H              | 4.09           | ddd | 8.70 / 4.50 / 4.50  | 36-H <sub>3</sub>    | 0.83           | d   | 6.97                |
| 18-H              | 5.29           | dd  | 9.17 / 1.80         | 37-H <sub>3</sub>    | 0.98 / 0.96*   | d   | 7.34                |
| 19-Ha             | 1.57           |     |                     | 38-H <sub>3</sub>    | 3.28           | s   |                     |
| 19-Hb             | 1.55           |     |                     | 39-H <sub>3</sub>    | 3.02 / 3.05*   | s   |                     |
| 20-H              | 3.01           | m   |                     |                      |                |     |                     |

\*minor isomer

**Table 3. <sup>1</sup>H-NMR data for the tetra-Mosher esters of rhizopodin (selected signals) (600 MHz, CD<sub>3</sub>OD)**

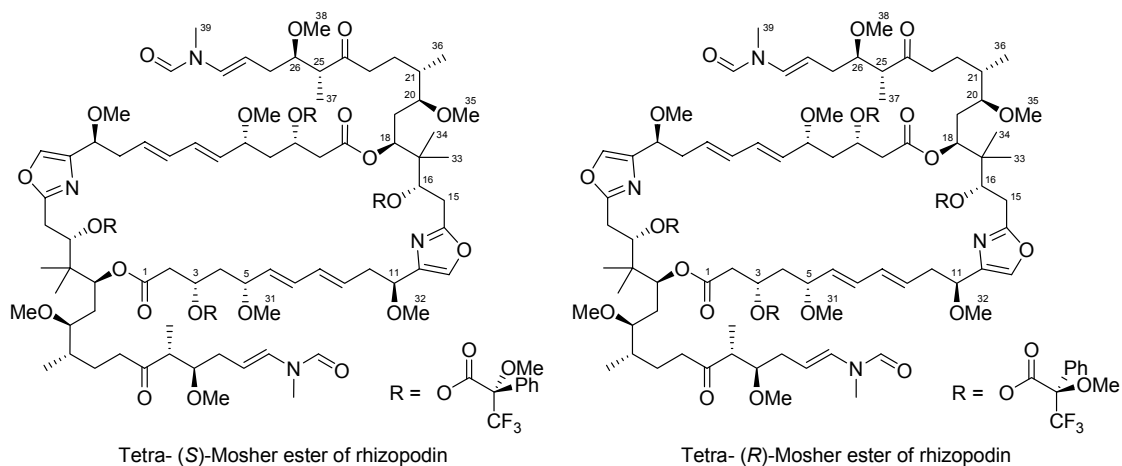

| #-H                  | S-Mosher ester of rhizopodin | R-Mosher ester of rhizopodin | $\Delta \delta$ (S-R) |
|----------------------|------------------------------|------------------------------|-----------------------|
|                      | $\delta$ (ppm)               | $\delta$ (ppm)               |                       |
| 2a-H                 | 2.88                         | 2.79                         | 0.09                  |
| 2b-H                 | 2.88                         | 2.72                         | 0.16                  |
| 3-H                  | 5.48                         | 5.52                         | -0.04                 |
| 4a-H                 | 2.00                         | 2.12                         | -0.12                 |
| 4b-H                 | 1.77                         | 1.93                         | -0.16                 |
| 5-H                  | 3.44                         | 3.71                         | -0.27                 |
| 6-H                  | 5.27                         | 5.40                         | -0.13                 |
| 7-H                  | 5.99                         | 6.09                         | -0.15                 |
| 8-H                  | 6.02                         | 6.14                         | -0.07                 |
| 9-H                  | 5.62                         | 5.64                         | -0.02                 |
| 11-H                 | 4.22                         | 4.23                         | -0.01                 |
| 13-H                 | 7.69                         | 7.74                         | -0.05                 |
| 15-Ha                | 3.30                         | 3.30                         | 0                     |
| 15-Hb                | 3.07                         | 3.21                         | -0.14                 |
| 16-H                 | 5.62                         | 5.51                         | 0.11                  |
| 18-H                 | 5.22                         | 5.07                         | 0.15                  |
| 19-H <sub>2</sub>    | 1.64                         | 1.55                         | 0.09                  |
| 20-H                 | 3.03                         | 2.93                         | 0.1                   |
| 21-H                 | 1.82                         | 1.76                         | 0.06                  |
| 22-Ha                | 1.81                         | 1.76                         | 0.05                  |
| 22-Hb                | 1.25                         | 1.22                         | 0.03                  |
| 26-H                 | 3.51                         | 3.52                         | -0.01                 |
| 27-Ha                | 2.54                         | 2.55                         | -0.01                 |
| 27-Hb                | 2.23                         | 2.24                         | -0.01                 |
| 28-H                 | 5.27                         | 5.23                         | 0.04                  |
| 31-H <sub>3</sub>    | 3.09                         | 3.20                         | -0.11                 |
| 32-H <sub>3</sub>    | 3.22                         | 3.28                         | -0.06                 |
| 33/34-H <sub>3</sub> | 0.90                         | 0.89                         | 0.01                  |
| 35-H <sub>3</sub>    | 3.33                         | 3.24                         | 0.09                  |

**Table 4.  $^{13}\text{C}$  NMR data: comparison of the rhizopodin side chain with structurally related polyketides**

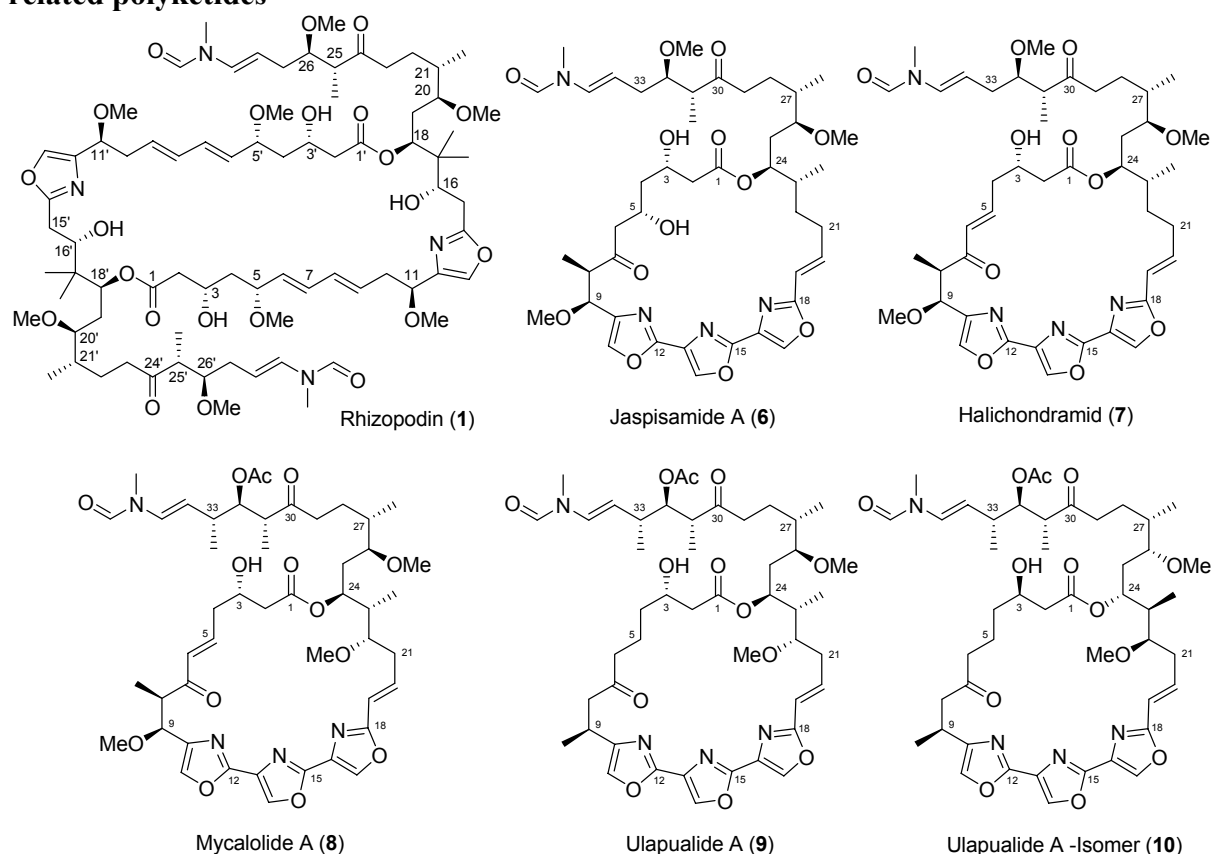

Only the data of the major isomer is compared

| #-C          | 1 <sup>1)</sup> | 6 <sup>2)</sup> | 7 <sup>3)</sup> | 8 <sup>4)</sup> | 9 <sup>5)</sup> $\delta$ (ppm) |                       |
|--------------|-----------------|-----------------|-----------------|-----------------|--------------------------------|-----------------------|
|              | $\delta$ (ppm)  | $\delta$ (ppm)  | $\delta$ (ppm)  | $\delta$ (ppm)  | natural: 20,21 syn             | synthetic: 20,21 anti |
| C-18 / 24    | 75.7            | 74.60           | 74.0            | 73.2            | 73.0                           | 72.8                  |
| C-19 / 25    | 31.0            | 33.14           | 32.0            | 32.0            | 32.1                           | 32.0                  |
| C-20 / 26    | 81.9            | 81.88           | 81.6            | 81.8            | 81.8                           | 81.0                  |
| C-21 / 27    | 34.6            | 34.68           | 34.5            | 34.4            | 40.4                           | 40.3                  |
| C-22 / 28    | 24.9            | 24.93           | 24.8            | 25.0            | 27.6                           | 26.6                  |
| C-23 / 29    | 41.6            | 42.37           | 41.1            | 39.5            | 39.8                           | 39.9                  |
| C-24 / 30    | 213.6           | 214.12          | 213.5           | 211.6           | 211.8                          | 211.5                 |
| C-25 / 31    | 49.0            | 49.10           | 48.6            | 48.9            | 48.6                           | 48.6                  |
| C-26 / 32    | 82.5            | 87.38           | 82.1            | 77.5            | 77.3                           | 77.6                  |
| C-27 / 33    | 30.9            | 29.72           | 30.1            | 36.9            | 37.0                           | 36.9                  |
| C-28 / 34    | 105.4           | 111.38          | 105.1           | 110.5           | 110.5                          | 110.5                 |
| C-29 / 35    | 130.4           | 130.07          | 130.1           | 129.5           | 129.6                          | 130.1                 |
| C-30 / NCHO  | 162.1           | 162.18          | 162.1           | 162.1           | 162.2                          | 162.2                 |
| C-35 / 26OMe | 58.1            | 58.18           | 57.8            | 58.2            | 58.1                           | 57.8                  |
| C-36 / 27Me  | 15.6            | 15.47           | 15.4            | 15.5            | 15.5                           | 14.2                  |
| C-37 / 31Me  | 12.8            | 13.52           | 12.7            | 13.3            | 13.4                           | 13.4                  |
| C-38 / 32OMe | 57.8            | 56.82           | 57.4            | ---             | ---                            | ---                   |
| C-39 / NMe   | 26.7            | 27.65           | 27.5            | 27.6            | 33.1                           | 32.8                  |

<sup>1)</sup>  $\text{CDCl}_3$ , 125 MHz, <sup>2)</sup>  $\text{CDCl}_3$ , 100 MHz, J. Kobayashi, O. Murata, H. Shigemori, *J. Nat. Prod.* **1993**, 56 (5), 787-791. <sup>3)</sup>  $\text{CDCl}_3$ , 90 MHz, M.R. Kernan, T.F. Molinski, D.J. Faulkner, *J. Org. Chem.* **1988**, 53, 5014-5020. <sup>4)</sup>  $\text{CDCl}_3$ , 125 MHz, N. Fusetani, K. Yasumuro, S. Matsunaga, K. Hashimoto, *THL* **1989**, 30(21), 2809-2812. <sup>5)</sup>  $\text{CDCl}_3$ , 125 MHz, S.K. Chattopadhyay, G. Pattenden, *J. Chem. Soc. Perkin Trans. 1*, **2000**, 2429-2454.

**Table 5. <sup>1</sup>H NMR data: comparison of the rhizopodin side chain with structurally related polyketides**

| #-C                      | 1 <sup>1)</sup> | 6 <sup>2)</sup> | 7 <sup>3)</sup> |
|--------------------------|-----------------|-----------------|-----------------|
|                          | δ (ppm)         | δ (ppm)         | δ (ppm)         |
| 18/24-H                  | 5.29            | 5.17            | 5.10            |
| 19a/25-H                 | 1.57            | 1.58            | 1.60            |
| 19b/25'-H                | 1.55            | 1.58            | 1.60            |
| 20/26-H                  | 3.01            | 2.98            | 2.97            |
| 21/27-H                  | 1.73            | 1.70            | 1.75            |
| 22a/28-H                 | 1.77            | 1.70            | 1.74            |
| 22b/28'-H                | 1.28            | 1.36            | 1.36            |
| 23a/29-H                 | 2.52            | 2.53            | 2.53            |
| 23b/29'-H                | 2.52            | 2.50            | 2.53            |
| 25/31-H                  | 2.69            | 2.74            | 2.74            |
| 26/32-H                  | 3.44            | 3.44            | 3.48            |
| 27a/33-H                 | 2.44            | 2.50            | 2.46            |
| 27b/33'-H                | 2.13            | 2.15            | 2.13            |
| 28/34-H                  | 5.07            | 5.10            | 5.10            |
| 29/35-H                  | 6.50            | 6.52            | 6.52            |
| 30-H/NCHO                | 8.27            | 8.28            | 8.29            |
| 35-H <sub>3</sub> /26OMe | 3.35            | 3.33            | 3.32            |
| 36-H <sub>3</sub> /27Me  | 0.83            | 0.84            | 0.85            |
| 37-H <sub>3</sub> /31Me  | 0.98            | 0.99            | 0.98            |
| 38-H <sub>3</sub> /32OMe | 3.28            | 3.29            | 3.30            |
| 39-H <sub>3</sub> /NMe   | 3.02            | 3.03            | 3.04            |

<sup>1)</sup> CDCl<sub>3</sub>, 600 MHz, <sup>2)</sup> CDCl<sub>3</sub>, 400 MHz, J. Kobayashi, O. Murata, H. Shigemori, *J. Nat. Prod.* **1993**, 56 (5), 787-791. <sup>3)</sup> CDCl<sub>3</sub>, 360 MHz, M.R. Kernan, T.F. Molinski, D.J. Faulkner, *J. Org. Chem.* **1988**, 53, 5014-5020.

## II. Copies of 1D and 2D NMR spectra

### $^1\text{H}$ NMR Spectrum of rhizopodin (1) in $\text{CD}_3\text{OD}$ (600 MHz)

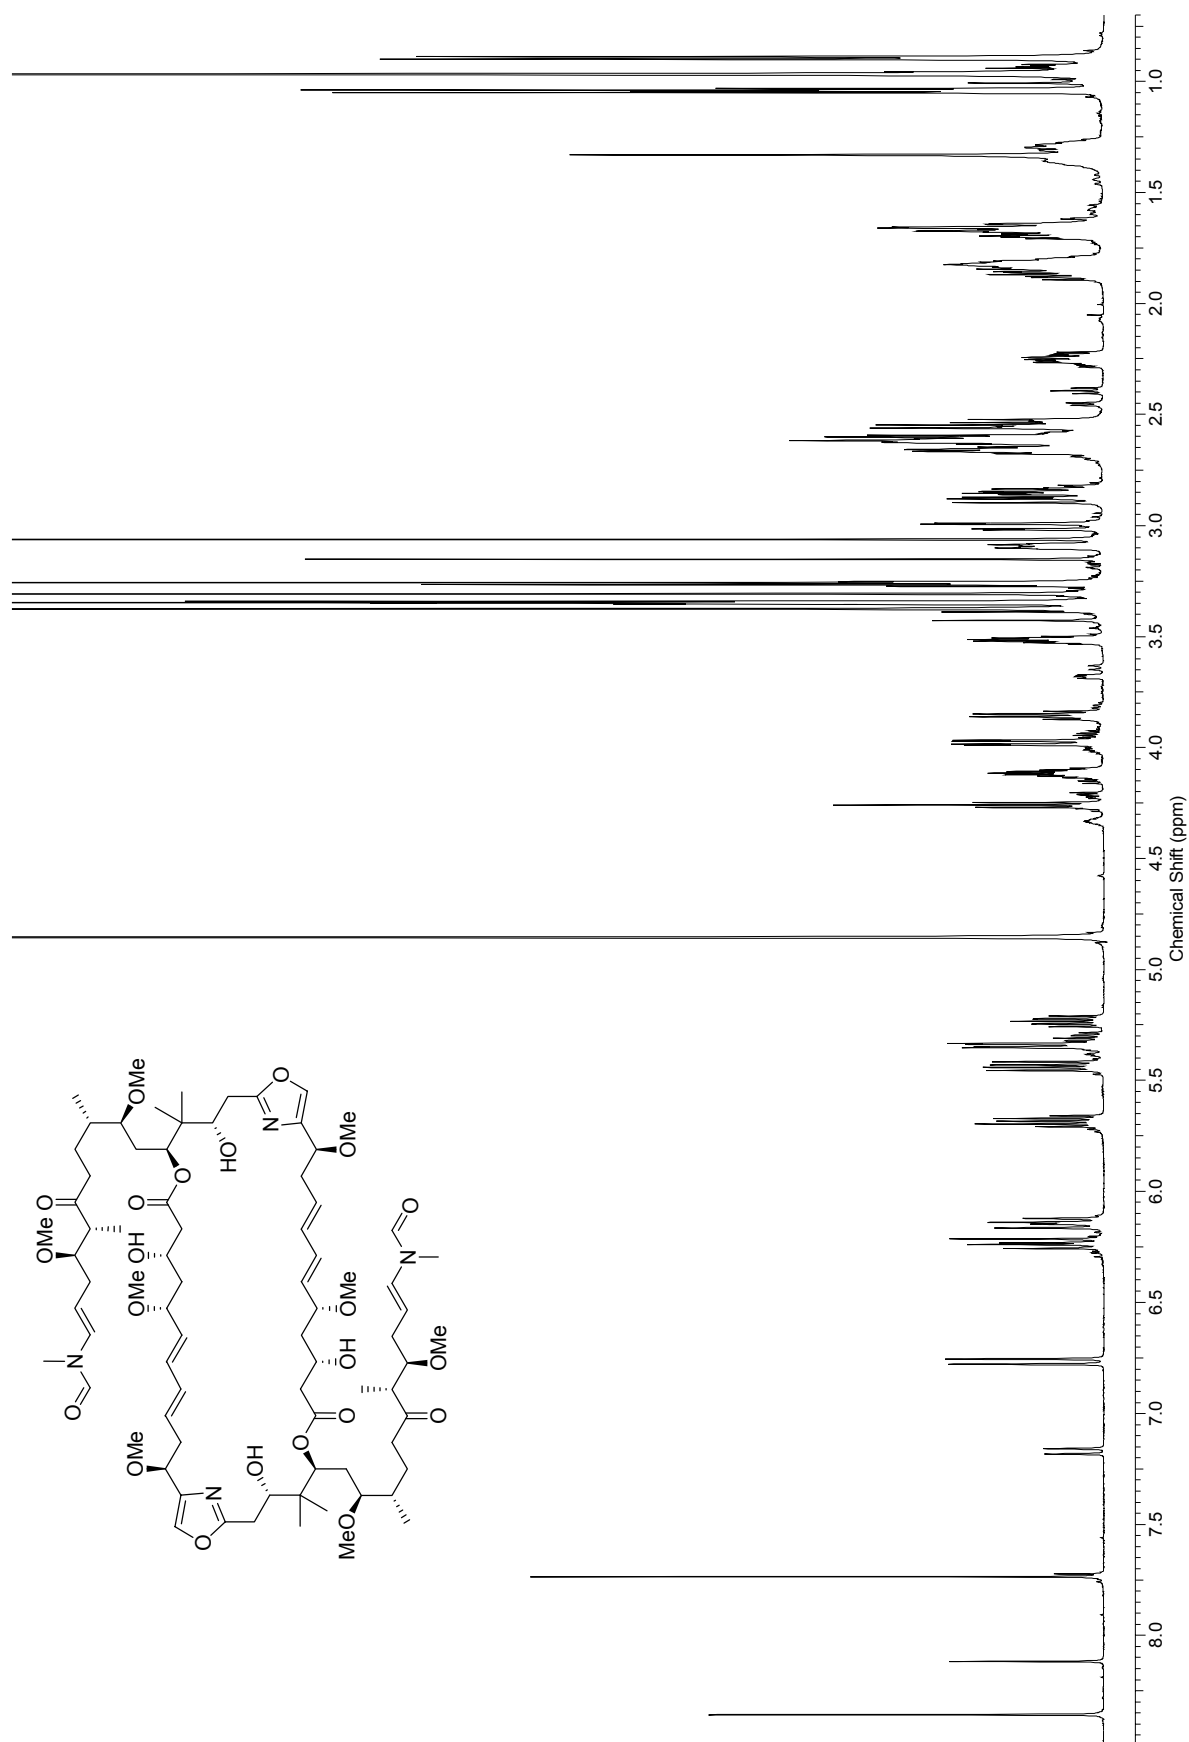

### ROESY Spectrum of rhizopodin (1) in CD<sub>3</sub>OD (600 MHz)

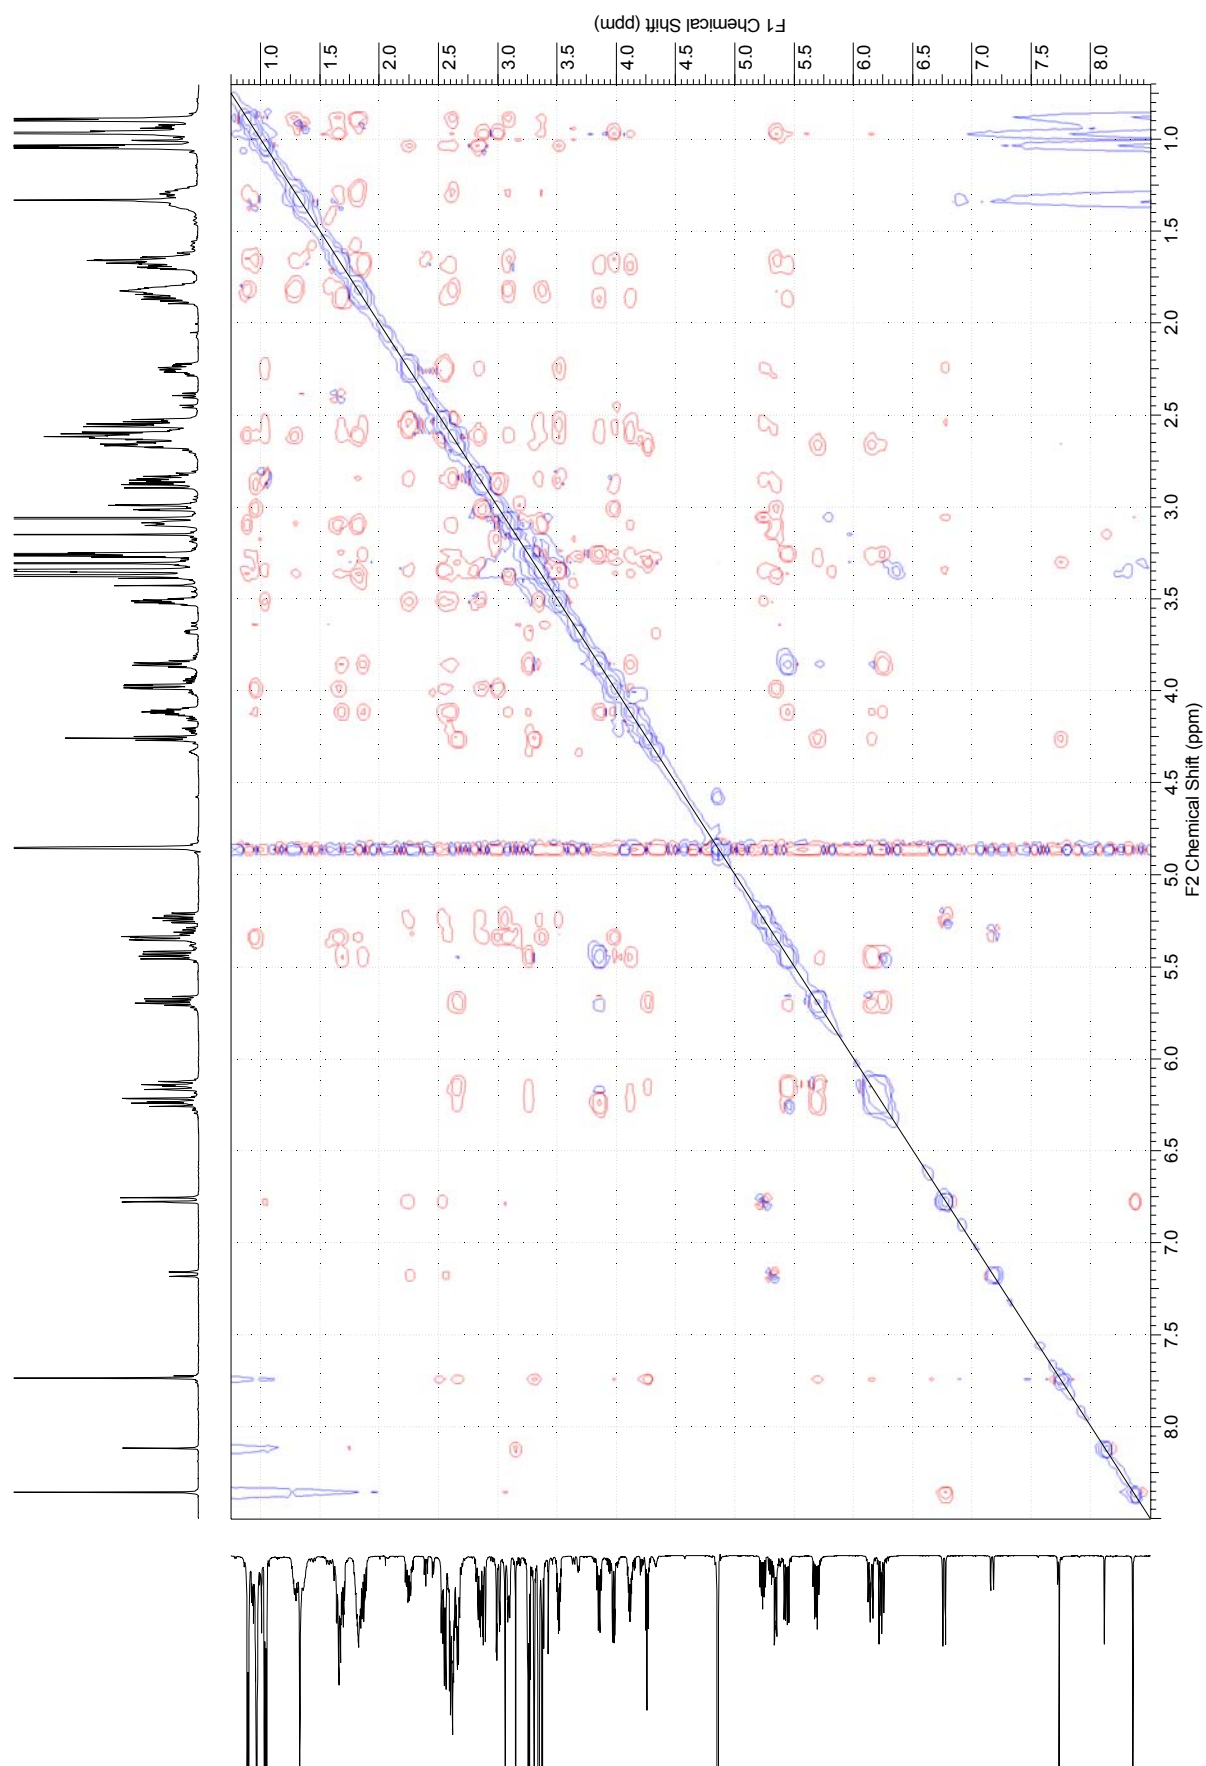



### III. Molecular Modeling

Molecular modeling studies were performed on potential diastereomers of archazolid using Macromodel (version 8.5)<sup>1</sup> and the MMFFs force field, together with the generalized Born/Surface area (GB/SA) chloroform solvent model. Files with constrained torsion angles were generated on the basis of spectral analysis (see Figure 2 of the manuscript). Structures were subjected to a minimization procedure to the nearest local minimum prior to the generation of new local energy conformers by Monte Carlo searching (20,000 steps). All conformations within 50 KJ mol<sup>-1</sup> were recorded. The normal set-up protocol was employed, with experiments sampling batches of 1000 to 2000 structures.

#### Perspective drawing of the lowest energy conformation of rhizopodin generated by Macromodel V 8.5

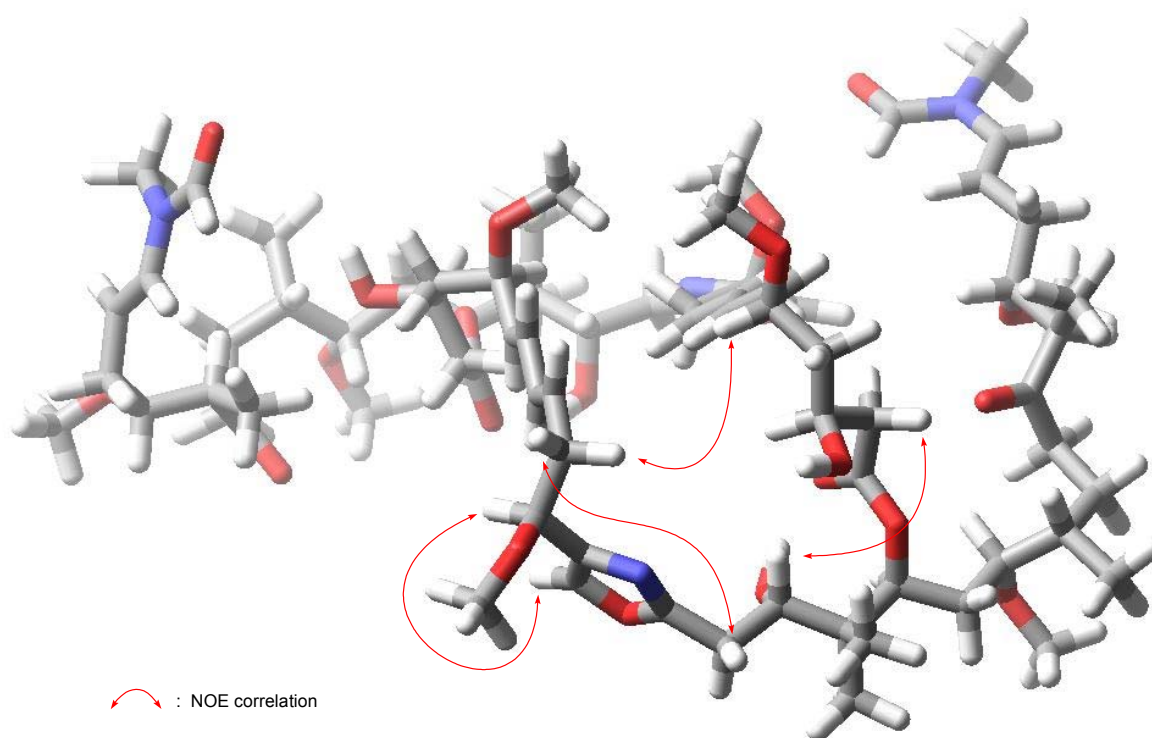

<sup>1</sup> Mohamadi, F.; Richards, N. G. J.; Guida, W. C.; Liskamp, R.; Lipton, M.; Caufield, C.; Chang, G.; Hendrickson, T.; Still, W. C. *J. Comp. Chem.* **1990**, *11*, 440.

## Output-file for the lowest energy conformation of rhizopodin

228

```
/home/ngl07/rhizopodin_solution_conform.xyz 0.0000000
C -43.71120 -28.74370 -13.03510
C -45.37560 -28.51690 -11.08620
C -42.63090 -30.35320 -7.99300
C -41.68470 -31.29700 -8.09020
C -41.14620 -31.77490 -9.40660
C -39.68840 -31.34920 -9.63970
C -39.45530 -29.82940 -9.61120
C -38.97140 -29.35400 -8.24200
C -39.03350 -27.85230 -8.14730
O -37.85010 -27.30900 -8.53100
C -37.66570 -25.86610 -8.49750
O -40.02870 -27.21390 -7.83040
C -37.91210 -25.25640 -9.92800
C -39.42080 -25.48420 -10.31890
C -39.87960 -24.88070 -11.65550
C -43.84620 -27.28220 -13.52290
C -42.99850 -26.33070 -12.73290
N -41.61750 -26.41480 -12.69720
C -41.25190 -25.35370 -12.00330
O -42.29380 -24.58040 -11.56800
C -43.40030 -25.21810 -12.02850
O -40.24700 -24.91360 -9.29090
C -36.99410 -25.92770 -10.96890
C -37.59960 -23.74280 -9.90650
C -36.24780 -25.69870 -7.89100
C -36.29440 -25.99040 -6.36570
C -35.23210 -26.98080 -5.80930
C -35.34800 -27.18790 -4.27350
C -36.75340 -27.48370 -3.74680
C -37.31150 -28.81440 -4.21250
C -37.28740 -29.98290 -3.22870
O -36.43350 -24.77180 -5.61750
C -33.77880 -26.64470 -6.16540
O -37.73820 -28.95800 -5.36080
C -38.73430 -30.13690 -2.70120
C -39.01460 -31.44840 -1.92920
C -40.44550 -31.51980 -1.44290
C -36.74840 -31.22240 -3.93950
O -39.10640 -28.96320 -1.94480
C -40.79540 -31.79050 -0.17750
N -42.08010 -31.81990 0.34680
C -42.22180 -32.18610 1.75120
C -43.23940 -31.50300 -0.35560
O -44.38260 -31.52800 0.08810
O -38.42420 -29.52900 -10.56490
O -41.17050 -33.20820 -9.41800
C -42.46630 -33.74230 -9.66470
O -43.49380 -27.27600 -14.92590
C -43.87660 -26.07700 -15.58840
C -35.31480 -23.90470 -5.55160
C -38.53150 -28.80740 -0.65490
H -41.26210 -31.75370 -7.19800
H -41.74810 -31.39900 -10.24480
H -39.02970 -31.84820 -8.91550
H -39.37540 -31.75830 -10.61040
H -40.34870 -29.28140 -9.93180
H -39.57730 -29.74760 -7.42180
H -37.93970 -29.67610 -8.05490
```

|   |           |           |           |
|---|-----------|-----------|-----------|
| H | -39.62600 | -26.56050 | -10.36000 |
| H | -39.20970 | -25.16720 | -12.47080 |
| H | -39.89920 | -23.78590 | -11.60130 |
| H | -44.90090 | -26.98480 | -13.45600 |
| H | -44.34910 | -24.75280 | -11.80590 |
| H | -40.42960 | -25.62970 | -8.64190  |
| H | -37.22960 | -26.99010 | -11.08730 |
| H | -35.93940 | -25.84780 | -10.68440 |
| H | -37.08660 | -25.45700 | -11.95310 |
| H | -37.82410 | -23.26970 | -10.86820 |
| H | -38.17860 | -23.22540 | -9.13440  |
| H | -36.53960 | -23.54620 | -9.71900  |
| H | -35.57680 | -26.41090 | -8.38370  |
| H | -35.87610 | -24.69070 | -8.07180  |
| H | -37.24960 | -26.49220 | -6.18360  |
| H | -35.43530 | -27.94680 | -6.29180  |
| H | -34.68410 | -28.01400 | -3.98600  |
| H | -34.97290 | -26.29830 | -3.75480  |
| H | -36.71720 | -27.48880 | -2.65200  |
| H | -37.47270 | -26.69960 | -4.00220  |
| H | -36.58850 | -29.73690 | -2.42370  |
| H | -33.39470 | -25.79300 | -5.60000  |
| H | -33.13090 | -27.49700 | -5.93030  |
| H | -33.65450 | -26.43080 | -7.23000  |
| H | -39.41050 | -30.12970 | -3.56780  |
| H | -38.84860 | -32.30780 | -2.58870  |
| H | -38.31760 | -31.54830 | -1.08890  |
| H | -41.18720 | -31.31570 | -2.20980  |
| H | -36.56650 | -32.03450 | -3.22860  |
| H | -37.44500 | -31.58360 | -4.70370  |
| H | -35.79790 | -31.00060 | -4.43790  |
| H | -40.01220 | -32.00900 | 0.54760   |
| H | -43.26670 | -32.19600 | 2.07230   |
| H | -41.80120 | -33.18500 | 1.90440   |
| H | -41.67770 | -31.46050 | 2.36460   |
| H | -43.06100 | -31.20650 | -1.39760  |
| H | -38.77280 | -29.72750 | -11.45080 |
| H | -42.83650 | -33.41490 | -10.64080 |
| H | -42.39020 | -34.83300 | -9.67090  |
| H | -43.16780 | -33.45210 | -8.87730  |
| H | -43.60820 | -26.16790 | -16.64450 |
| H | -44.95880 | -25.92830 | -15.51840 |
| H | -43.35030 | -25.21030 | -15.17770 |
| H | -35.68200 | -22.89680 | -5.33770  |
| H | -34.66540 | -24.19470 | -4.72260  |
| H | -34.74260 | -23.86890 | -6.48130  |
| H | -38.89470 | -29.56640 | 0.04040   |
| H | -37.44050 | -28.82640 | -0.68910  |
| H | -38.83950 | -27.83140 | -0.26900  |
| C | -44.72280 | -28.29740 | -5.47480  |
| C | -44.09110 | -28.92120 | -6.69030  |
| C | -43.14000 | -29.86400 | -6.73580  |
| C | -46.29920 | -29.13930 | -10.16240 |
| C | -47.00410 | -28.45510 | -9.24510  |
| C | -48.02060 | -29.03120 | -8.27830  |
| C | -49.41520 | -28.42570 | -8.53560  |
| C | -49.88030 | -27.41510 | -7.47070  |
| C | -48.98870 | -26.17170 | -7.38790  |
| C | -49.25370 | -25.24360 | -6.22380  |
| O | -50.08330 | -25.77200 | -5.29380  |
| C | -50.52310 | -24.91640 | -4.20140  |
| O | -48.70340 | -24.15310 | -6.10490  |
| C | -49.80470 | -25.34640 | -2.86290  |

|   |           |           |           |
|---|-----------|-----------|-----------|
| C | -48.24590 | -25.23500 | -3.03900  |
| C | -47.40340 | -25.60080 | -1.79190  |
| C | -44.08760 | -28.53390 | -4.08060  |
| C | -44.70520 | -27.61700 | -3.06290  |
| N | -46.02890 | -27.23470 | -3.15370  |
| C | -46.18130 | -26.36840 | -2.17180  |
| O | -45.06940 | -26.20300 | -1.39100  |
| C | -44.13270 | -27.00640 | -1.97080  |
| O | -47.90090 | -23.88630 | -3.40050  |
| C | -50.18350 | -26.80220 | -2.50830  |
| C | -50.25840 | -24.41150 | -1.71710  |
| C | -52.06300 | -25.06710 | -4.20640  |
| C | -52.74390 | -24.17780 | -5.28070  |
| C | -53.84550 | -24.91820 | -6.09160  |
| C | -54.70530 | -23.98470 | -6.98320  |
| C | -53.98610 | -22.94280 | -7.83330  |
| C | -53.05010 | -23.43760 | -8.92180  |
| C | -53.47040 | -24.58640 | -9.84450  |
| O | -53.37140 | -23.06010 | -4.63060  |
| C | -54.82310 | -25.70280 | -5.19560  |
| O | -51.97650 | -22.84670 | -9.09080  |
| C | -54.58360 | -24.12960 | -10.82370 |
| C | -54.96910 | -25.20610 | -11.87380 |
| C | -55.34830 | -26.51890 | -11.23250 |
| C | -52.21690 | -25.08130 | -10.58450 |
| O | -55.75990 | -23.81030 | -10.05760 |
| C | -54.65330 | -27.65330 | -11.40440 |
| N | -54.87930 | -28.84460 | -10.73560 |
| C | -55.92510 | -28.96300 | -9.72810  |
| C | -54.09190 | -29.96230 | -10.99870 |
| O | -54.17350 | -31.05670 | -10.45280 |
| O | -51.20930 | -27.00480 | -7.82760  |
| O | -48.14390 | -30.44810 | -8.46310  |
| C | -47.33500 | -31.20170 | -7.56600  |
| O | -44.08570 | -29.91800 | -3.67730  |
| C | -45.36060 | -30.47220 | -3.38000  |
| C | -52.48160 | -21.98590 | -4.35400  |
| C | -56.57860 | -22.81390 | -10.66160 |
| H | -44.72830 | -27.21340 | -5.66040  |
| H | -45.77520 | -28.60590 | -5.47070  |
| H | -44.47280 | -28.52440 | -7.63000  |
| H | -42.72540 | -30.28610 | -5.82370  |
| H | -46.43490 | -30.21570 | -10.24750 |
| H | -46.85550 | -27.37980 | -9.17400  |
| H | -47.70420 | -28.82250 | -7.24960  |
| H | -49.46390 | -27.94650 | -9.52390  |
| H | -50.16590 | -29.22780 | -8.58580  |
| H | -49.94130 | -27.92080 | -6.50050  |
| H | -47.93970 | -26.46460 | -7.28290  |
| H | -49.10890 | -25.57640 | -8.30030  |
| H | -47.94860 | -25.87170 | -3.87950  |
| H | -47.95420 | -26.23040 | -1.08990  |
| H | -47.10640 | -24.69280 | -1.25250  |
| H | -43.02690 | -28.25960 | -4.15600  |
| H | -43.15230 | -27.01200 | -1.51780  |
| H | -48.00020 | -23.80180 | -4.37360  |
| H | -51.26900 | -26.92980 | -2.44510  |
| H | -49.78920 | -27.10940 | -1.53470  |
| H | -49.80660 | -27.50560 | -3.25890  |
| H | -49.72940 | -24.62760 | -0.78270  |
| H | -50.07590 | -23.35990 | -1.96540  |
| H | -51.32450 | -24.52030 | -1.49810  |
| H | -52.27670 | -26.12140 | -4.41380  |

|   |           |           |           |
|---|-----------|-----------|-----------|
| H | -52.48980 | -24.82230 | -3.23020  |
| H | -52.00420 | -23.81130 | -6.00270  |
| H | -53.34700 | -25.64680 | -6.74220  |
| H | -55.33250 | -24.61290 | -7.62650  |
| H | -55.40550 | -23.43710 | -6.33740  |
| H | -54.73100 | -22.30170 | -8.31900  |
| H | -53.40990 | -22.27150 | -7.18860  |
| H | -53.82970 | -25.39650 | -9.20050  |
| H | -55.63530 | -26.13450 | -5.79120  |
| H | -54.33400 | -26.53830 | -4.68720  |
| H | -55.27100 | -25.05650 | -4.43370  |
| H | -54.24340 | -23.22540 | -11.34680 |
| H | -54.14760 | -25.34010 | -12.58730 |
| H | -55.83060 | -24.86960 | -12.46150 |
| H | -56.20210 | -26.47330 | -10.56200 |
| H | -52.39970 | -25.99330 | -11.15410 |
| H | -51.84320 | -24.32230 | -11.28150 |
| H | -51.41140 | -25.30390 | -9.87730  |
| H | -53.81000 | -27.65710 | -12.09180 |
| H | -55.95450 | -29.96310 | -9.28670  |
| H | -55.73690 | -28.24170 | -8.92700  |
| H | -56.89770 | -28.76600 | -10.19080 |
| H | -53.33880 | -29.78010 | -11.78380 |
| H | -51.76500 | -27.80640 | -7.85830  |
| H | -47.46290 | -32.26170 | -7.80380  |
| H | -46.27880 | -30.94280 | -7.67790  |
| H | -47.65790 | -31.03720 | -6.53300  |
| H | -46.03350 | -30.41650 | -4.23830  |
| H | -45.21530 | -31.52900 | -3.13800  |
| H | -45.80680 | -29.99080 | -2.50620  |
| H | -51.71350 | -22.28740 | -3.63890  |
| H | -52.02030 | -21.61770 | -5.27540  |
| H | -53.05860 | -21.17240 | -3.90700  |
| H | -56.03470 | -21.86690 | -10.72950 |
| H | -56.91980 | -23.12380 | -11.65260 |
| H | -57.45570 | -22.66260 | -10.02610 |
| H | -43.03940 | -29.90680 | -8.89890  |
| H | -38.37350 | -25.41090 | -7.79340  |
| H | -50.27710 | -23.86870 | -4.40620  |
| C | -44.64480 | -29.23850 | -11.95130 |
| H | -44.72600 | -30.32530 | -11.92050 |
| H | -45.31430 | -27.43300 | -11.06880 |
| H | -43.89730 | -29.39820 | -13.89970 |
| H | -42.67950 | -28.96060 | -12.72890 |
